# Supplementary material
Source: Springer Nature journal article supplement (https://gallowaylab.mit.edu/wp-content/uploads/2026/04/41551_2026_1677_MOESM1_ESM.pdf)
Supplement: MOESM1 [file 41551_2026_1677_MOESM1_ESM.pdf]

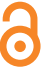

---

# **STRAIGHT-IN Dual: a platform for dual single-copy integrations of DNA payloads and gene circuits into human induced pluripotent stem cells**

---

In the format provided by the authors and unedited

---

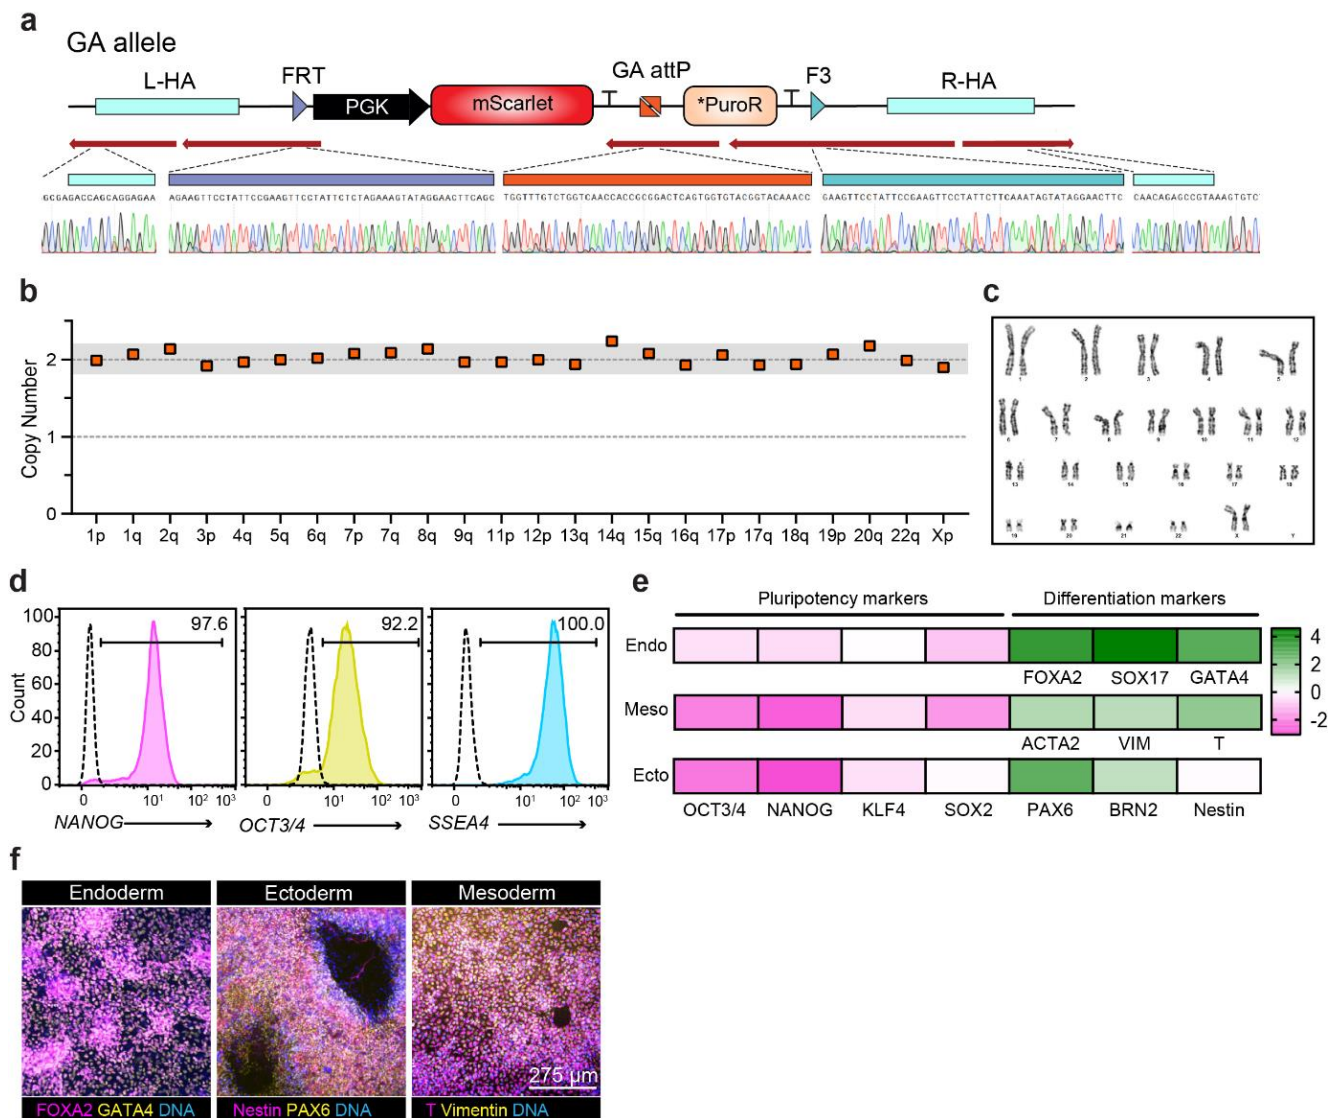

### Supplementary Figure 1. Characterization of the STRAIGHT-IN Dual hiPSC line

**(a)** Sanger sequencing confirming correct targeting of the GA allele at the *CLYBL* locus, including sequences of the *FRT*, *F3* and *GA attP* sites. Red arrows indicate alignment of the sequencing chromatograms with the reference sequence. L-HA, left homology arm; R-HA, right homology arm.

**(b)** ddPCR analysis of 24 genomic loci covering >90% of the most common genetic abnormalities in hiPSCs. The STRAIGHT-IN Dual line showed a normal copy number (2) at all loci screened.

**(c)** G-banding karyogram confirming the STRAIGHT-IN Dual hiPSC line has a normal karyotype.

**(d)** Flow cytometry analysis of pluripotency-associated markers NANOG, OCT3/4 and SSEA-4 in the STRAIGHT-IN Dual hiPSC line. Dashed lines indicate unstained hiPSCs.

**(e)** Gene expression analysis of pluripotency-associated and lineage-specific markers following differentiation into the three germ layers. Values are normalized to *RPL37A* and presented relative to undifferentiated hiPSCs (log10-transformed). N=3 independent differentiation.

**(f)** Representative immunofluorescence images showing expression of germ layer markers: FOXA2 and GATA4 (endoderm), Nestin and PAX6 (ectoderm), and T and Vimentin (mesoderm) in differentiated STRAIGHT-IN Dual hiPSCs.

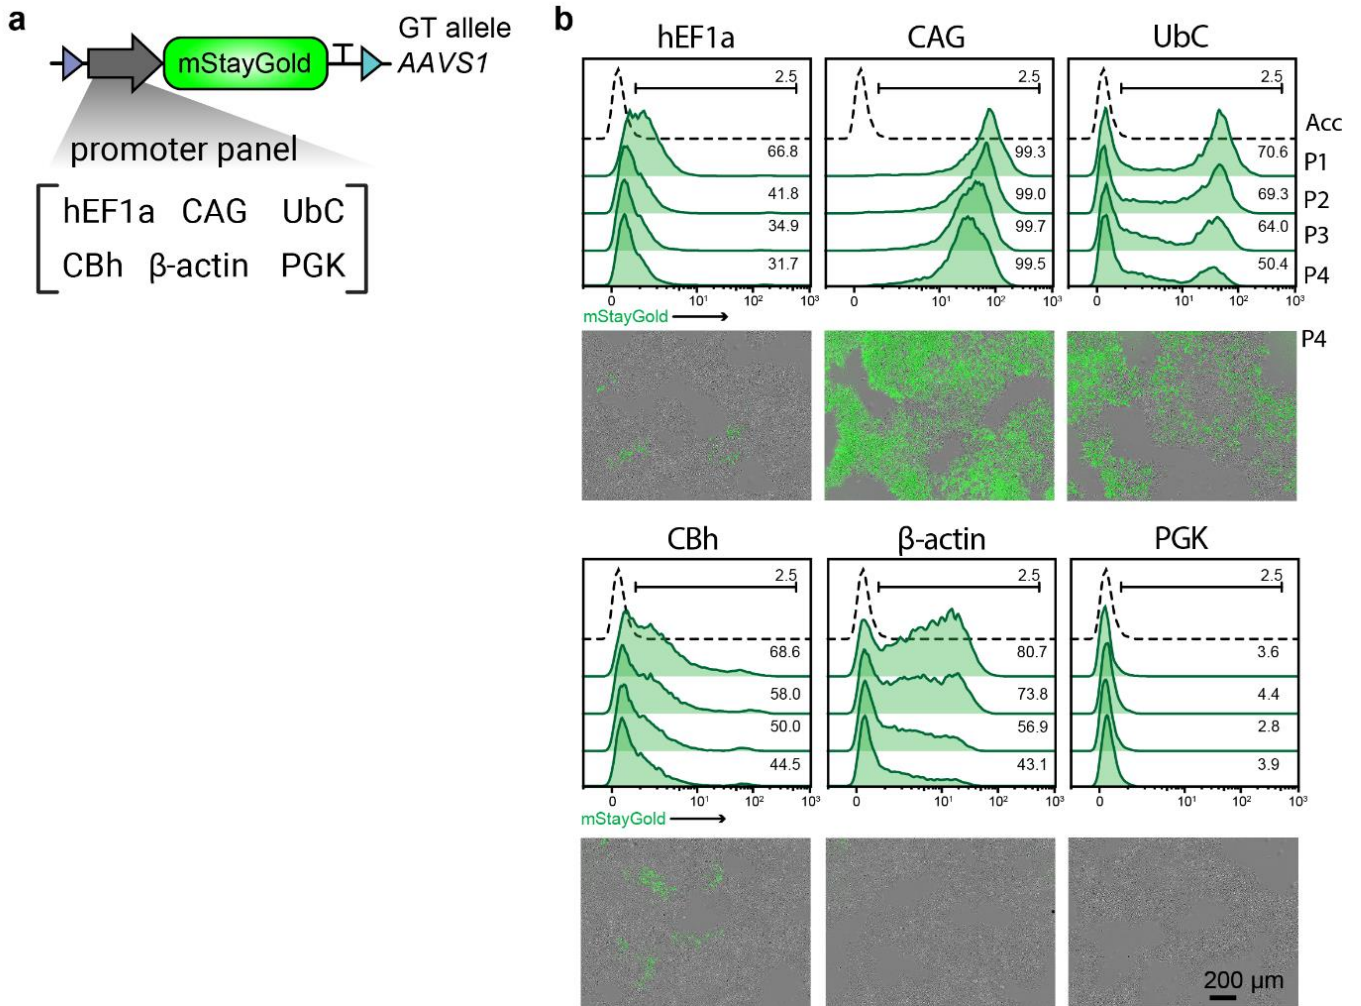

### Supplementary Figure 2. Characterization of promoter activity at the AAVS1 locus

**(a)** Schematic of the promoter panel, each driving expression of a *mStayGold* reporter and integrated at the *AAVS1* locus in STRAIGHT-IN *AAVS1* v2 acceptor hiPSCs.

**(b)** Flow cytometry analysis over 4 passages (*top*), and representative fluorescence/phase-contrast images at passage 4 (*bottom*), of hiPSCs expressing *mStayGold* from the different promoters indicated and integrated at the *AAVS1* locus, prior to excision of the auxiliary sequences. Dashed lines represent untransfected hiPSCs.

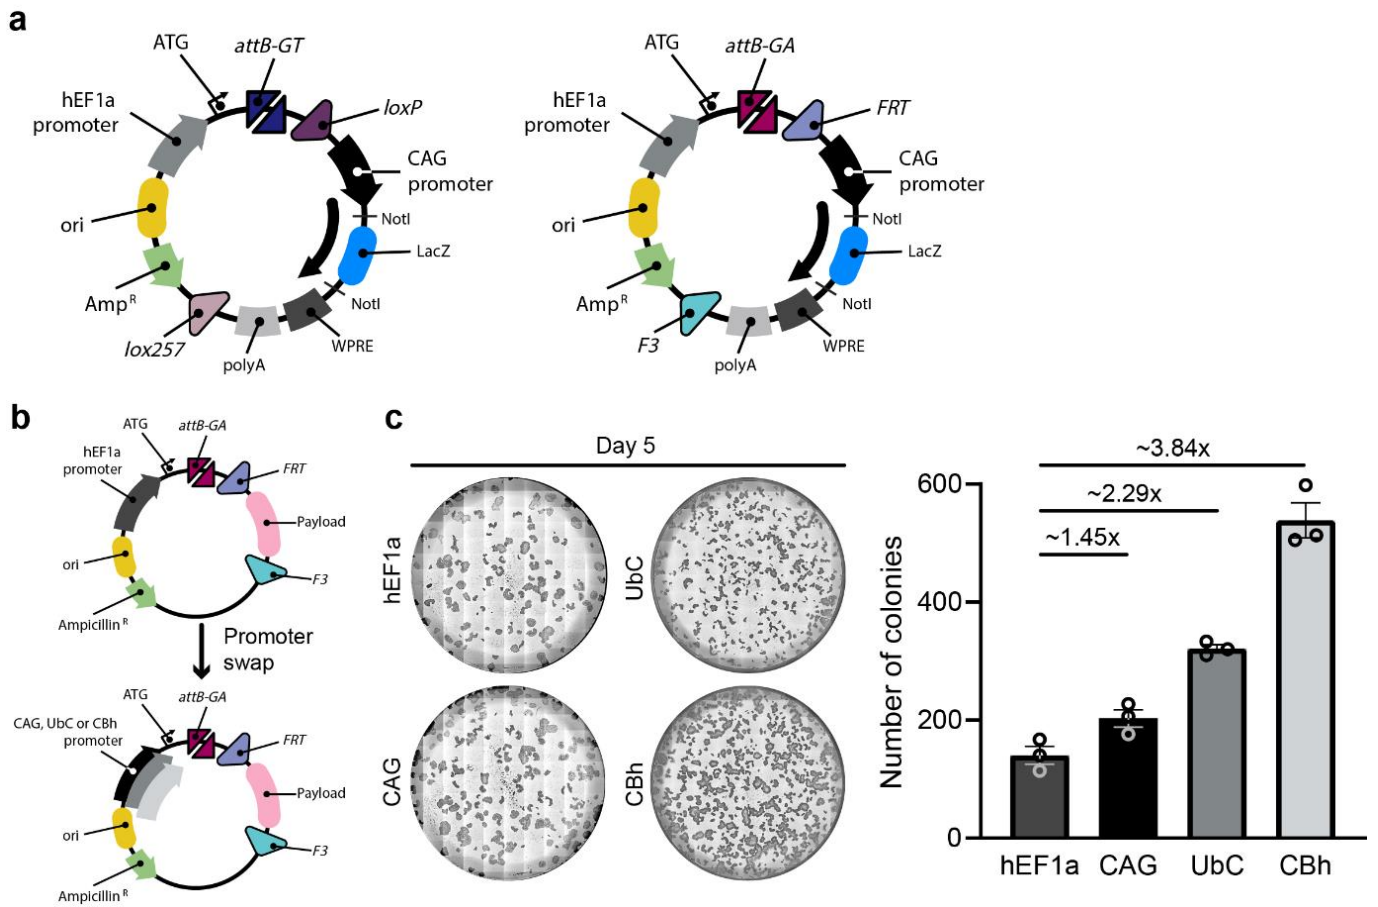

**Supplementary Figure 3. Optimization of STRAIGHT-IN donor plasmid backbone for improved transgene expression and integration efficiency**

**(a)** Schematic of the GT and GA donor plasmids containing a CAG promoter, WPRE and bGH polyadenylation signal for improved constitutive gene of interest (GOI) expression. The *LacZ* cassette is replaced with the GOI via NotI digestion followed by isothermal assembly or T4 ligation. White colonies on IPTG/X-gal agar plates identify clones containing the GOI.

**(b)** Schematic of GA donor plasmids in which the hEF1a promoter was substituted for CAG, UbC or CBh promoter sequences to assess the impact on integration efficiency.

**(c)** Representative phase contrast images (*left*) showing puromycin-resistant hiPSC colonies following donor plasmid integration, and quantification of the mean colony number per well (*right*). N=3 independent transfections; error bars,  $\pm$ SEM.

*Parts of the figure were created in BioRender. Blanch Asensio, A. (2026)*

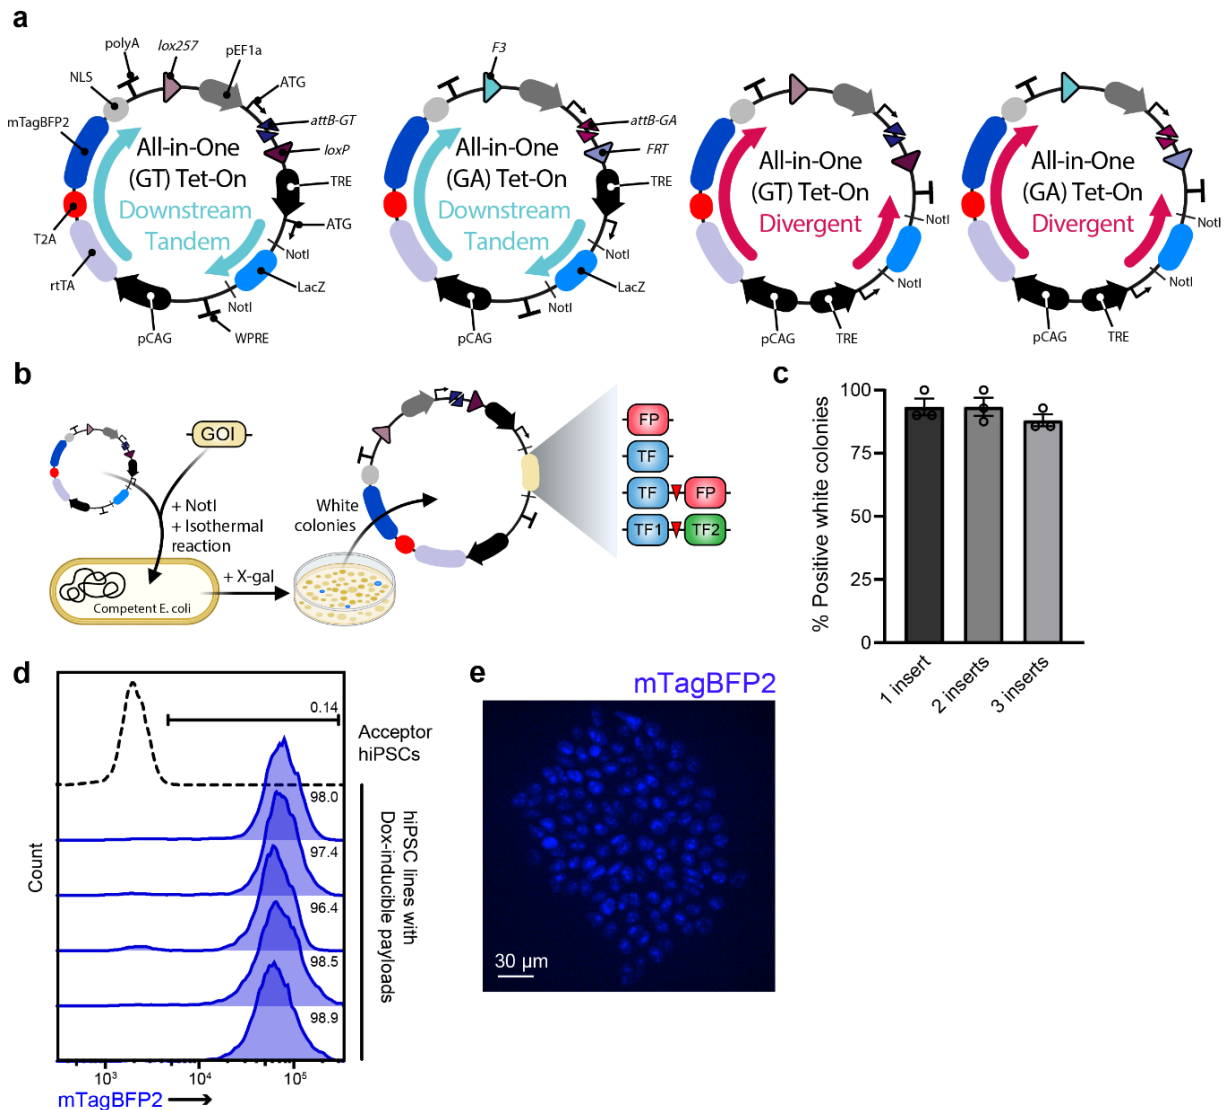

### Supplementary Figure 4. Modular cloning platform for assembling downstream tandem and divergent Tet-ON 3G donor plasmids

**(a)** Schematic of GT and GA donor plasmids encoding all-in-one Tet-ON 3G expression systems in either downstream tandem or divergent orientations.

**(b)** Overview of the cloning workflow, in which the *LacZ* cassette is replaced with one or more genes of interest (GOIs) via NotI digestion and isothermal assembly. IPTG/X-gal blue-white screening enables identification of clones containing the GOIs (white colonies).

**(c)** Mean percentages of white bacterial colonies that correctly assembled 1, 2, or 3 inserts into the downstream tandem donor plasmid, as confirmed by colony PCR. N=3 replicates; error bars,  $\pm$ SEM.

**(d)** Flow cytometry analysis of mTagBFP2 expression in hiPSC lines with integrated downstream tandem Tet-ON 3G GT donor plasmids containing various GOIs. Dashed line represents untransfected hiPSCs and values indicate the percentage of mTagBFP2<sup>+</sup> cells.

**(e)** Immunofluorescence image showing nuclear-localized mTagBFP2 expression in hiPSCs containing an integrated downstream tandem Tet-ON 3G GT donor plasmid.

Parts of the figure were created in BioRender. Blanch Asensio, A. (2026) <https://BioRender.com/4jnk7wh>

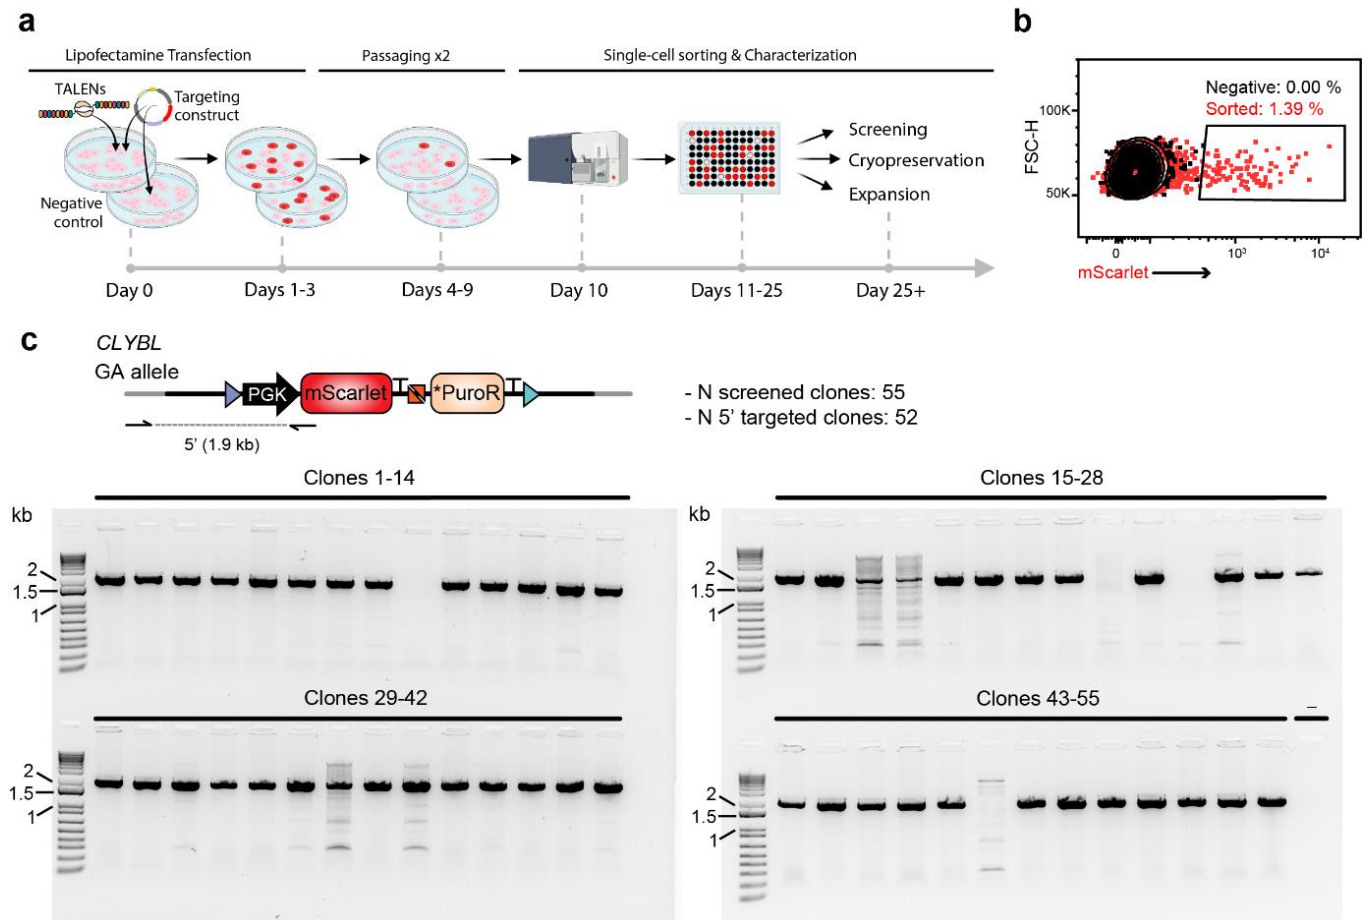

### Supplementary Figure 5. Targeting of *bxbl-GA attP* LP into the *CLYBL* locus

**(a)** Schematic of gene targeting workflow, lipofectamine-mediated co-transfection of the *CLYBL*-targeting construct and TALEN expression plasmids, followed by single-cell sorting and downstream clonal characterization.

**(b)** Flow cytometry analysis of hiPSCs expressing the mScarlet reporter from the GA allele.

**(c)** PCR screening results from 55 hiPSC clones using the primer pair indicated in the schematic to detect correct 5' junction integration.

Parts of the figure were created in BioRender. Blanch Asensio, A. (2026) <https://BioRender.com/p4zv120>

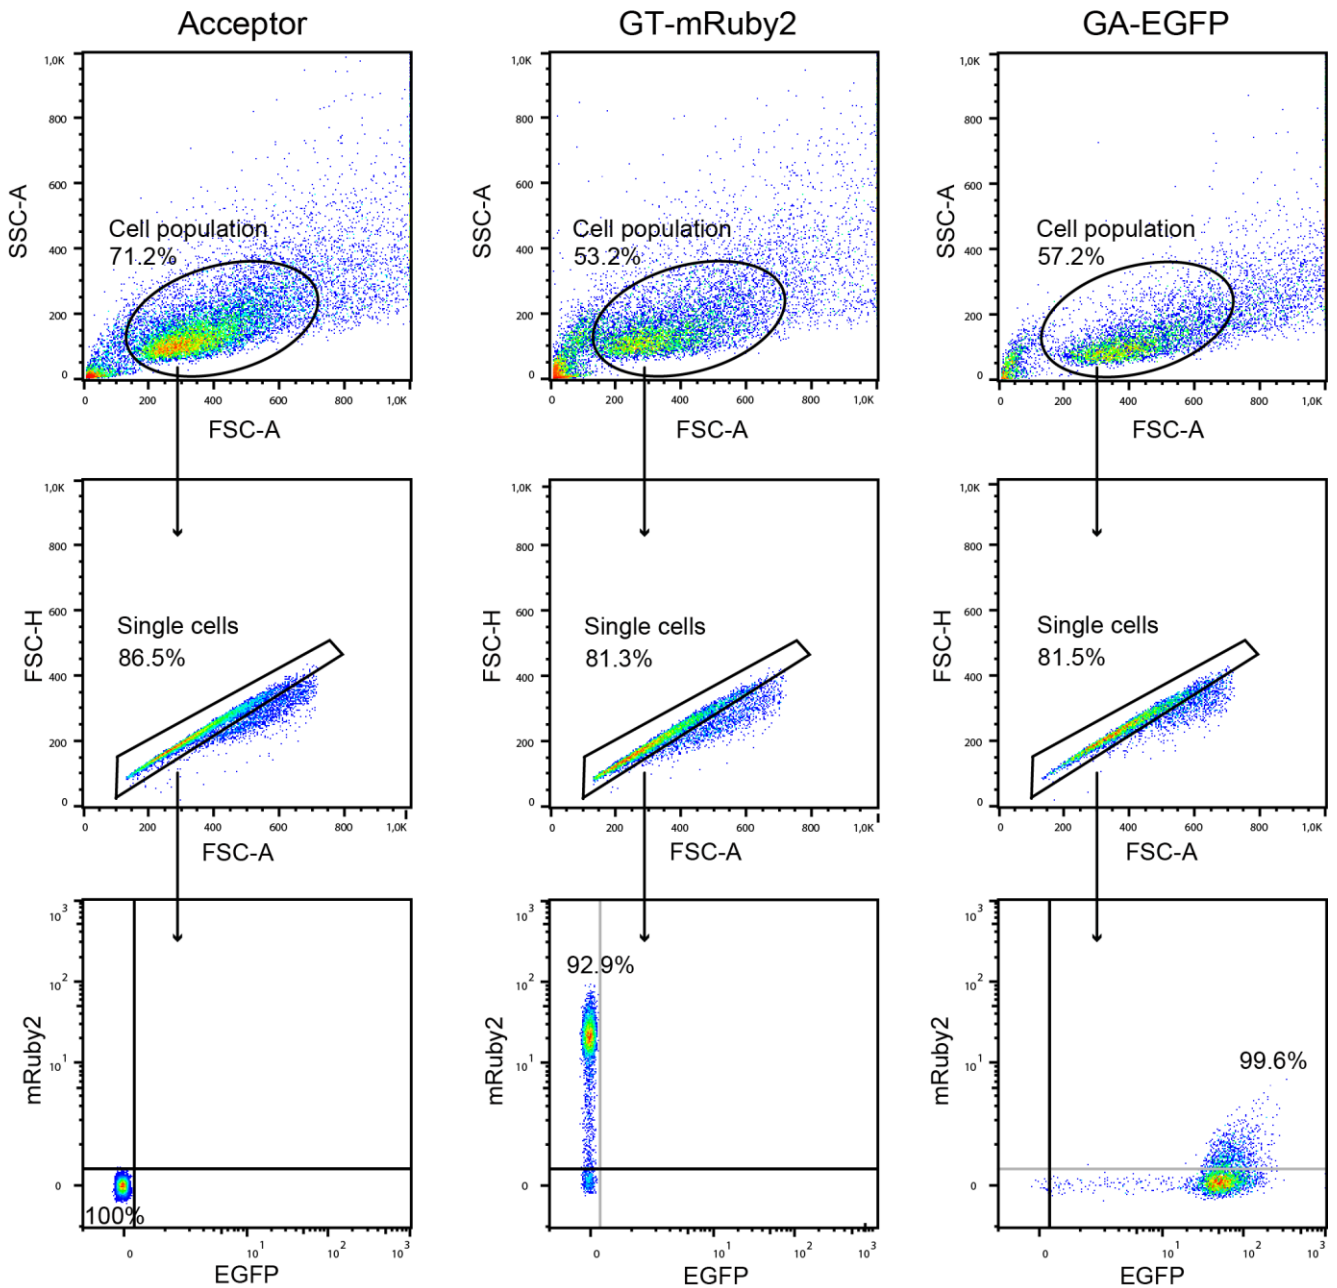

**Supplementary Figure 6. Examples of gating strategy used for flow cytometry analysis of hiPSCs**

Dot plots showing the gating workflow. Forward and side scatter was used to identify the cell population, with forward scatter area versus height used to distinguish single cells. Side scatter versus the appropriate fluorescence channel was used to gate mRuby2<sup>+</sup> or EGFP<sup>+</sup> hiPSCs.

**Supplementary Table 1. Genotyping PCR Oligonucleotides**

| Purpose                        | Sequence Forward Primer (5' - 3') | Sequence Reverse Primer (5' - 3') |
|--------------------------------|-----------------------------------|-----------------------------------|
| <i>GT allele</i> – 5' junction | AGATCATCCAGCCCTAGTCAAG            | CGGTGGTGCAGATGAACTTC              |
| <i>GT allele</i> – 3' junction | AGCAAAGACCCCAACGAGAA              | TGGAGCAGTGGATGACAACCTT            |
| <i>GA allele</i> – 5' junction | AGATCATCCAGCCCTAGTCAAG            | CCGTCTCGAAGTTCATCAC               |
| <i>GA allele</i> – 3' junction | GACATCACCTCCACAACGA               | TGGAGCAGTGGATGACAACCTT            |

**Supplementary Table 2. ddPCR Primer-Probe Sets**

| Target Gene                   | Assay type  | Primer/Probe                                                         | Sequence (5' - 3')                                                                                                        | Fluorophore-Quencher         | Source     |
|-------------------------------|-------------|----------------------------------------------------------------------|---------------------------------------------------------------------------------------------------------------------------|------------------------------|------------|
| <i>RPP30</i>                  | Copy number | Forward Primer<br>Reverse Primer<br>Probe                            | GATTTGGACCTGCGAGCG<br>GCGGCTGTCTCCACAAGT<br>CTGACCTGAAGGCTCT                                                              | HEX-ZEN-IBFQ                 | 38         |
| <i>EBFP2</i>                  | Copy number | Forward Primer<br>Reverse Primer<br>Probe                            | GCCGACAAGCAGAAGAACG<br>GGGTGTTCTGCTGGTAGTGG<br>AGATCCGCCACAACATCGAGG                                                      | FAM-ZEN-IBFQ                 | 38         |
| <i>mScarlet</i>               | Copy number | Forward Primer<br>Reverse Primer<br>Probe                            | TGGCAACCTGACTTGTATCG<br>GTCCATCACTGTCTTCACTATC<br>CGACAGGTGCTTCTGATCTGCAT                                                 | FAM-ZEN-IBFQ                 | This study |
| <i>BleoR</i>                  | Copy number | Forward Primer<br>Reverse Primer<br>Probe                            | AGTTGACCAGTGCCGTTC<br>CGAAGTCGTCTCCACGAAG<br>AGCCGGTCCGTCAGAAC                                                            | FAM-ZEN-IBFQ                 | 38         |
| <i>PuroR</i>                  | Copy number | Forward Primer<br>Reverse Primer<br>Probe                            | CGCCTTCTGGAGACCTC<br>TTGCGGGTCATGCACCAG<br>CTCGGCTTACCCTGACCG                                                             | FAM-ZEN-IBFQ                 | This study |
| <i>TurboGFP</i>               | Copy number | Forward Primer<br>Reverse Primer<br>Probe                            | TGATGGGCTACGGCTTCTAC<br>CACCCGC+AT+CGAGAAGTACG<br>ATCACCTTGAAGTCGCCGATC                                                   | FAM-ZEN-IBFQ                 | This study |
| <i>AmpR</i>                   | Copy number | Forward Primer<br>Reverse Primer<br>Probe                            | TTTCCGTGTCGCCCTTATTCC<br>ATGTAACCCACTCGTGCACCC<br>TGCTTCTGTTTTTGCTCACCCA                                                  | FAM-ZEN-IBFQ                 | 38         |
| <i>pUC Ori</i>                | Copy number | Forward Primer<br>Reverse Primer<br>Probe                            | CGATAAGTCGTGCTTACCG<br>GCTTTCATAGCTCACGC<br>TGACACAGCCAGCTTG                                                              | FAM-ZEN-IBFQ                 | 38         |
| <i>mTagBFP2</i>               | Copy number | Forward Primer<br>Reverse Primer<br>Probe                            | GGAGAACATGCACATGAAGCTGT<br>CCTGGGTAGCGGTGAGCA<br>AGGGCACCGTGGACAACC                                                       | FAM-ZEN-IBFQ                 | This study |
| <i>attP/attR</i><br>GT allele | Integration | Forward Primer<br>Reverse Primer<br>Reverse Primer<br>Probe<br>Probe | GCATTCTAGTTGTGGTTTGTCC<br>GCACTGGTCAACTTGGCATAT<br>CCTGCTTGCCGAATATCATG<br>CGTGGTTTGTCTGGTCAACCA<br>TCTCCGTCGTCAGGATCATCC | HEX-ZEN-IBFQ<br>HEX-ZEN-IBFQ | 23         |
| <i>attP/attR</i><br>GA allele | Integration | Forward Primer<br>Reverse Primer<br>Reverse Primer<br>Probe<br>Probe | CGTGGTTTGTCTGGTCAACCA<br>CGTGGGCTTGTACTCGGTAA<br>CTTAATTAAGTGTGATGCCTGC<br>CGTGGTTTGTCTGGTCAACCA<br>ACTCCGTCGTCAGGATCATCC | HEX-ZEN-IBFQ<br>HEX-ZEN-IBFQ | This study |

+ symbol indicates the following nucleotide is a locked nucleic acid

**Supplementary Table 3. Oligonucleotides used for NGS library**

| Gene              | Sequence (5' - 3')                                             | Annealing temperature |
|-------------------|----------------------------------------------------------------|-----------------------|
| hEF1a_Fwd         | G TTCAGAGTTCTACAGTCCGACGATC NNNNNNAGGAAAAGGGCCTTTCCGTCC        | 67.2°C                |
| $\beta$ actin_Fwd | G TTCAGAGTTCTACAGTCCGACGATC NNNNNNCCTCCGACCAGTGTTCCT           | 71.1°C                |
| CpGfree_Fwd       | G TTCAGAGTTCTACAGTCCGACGATC NNNNNNAGTACTCCCTCTCAAAGCTGGC       | 71.1°C                |
| PGK_Fwd           | G TTCAGAGTTCTACAGTCCGACGATC NNNNNNCTCCGCCCTAAGTCGGGAA          | 67.2°C                |
| RSV_Fwd           | G TTCAGAGTTCTACAGTCCGACGATC NNNNNNGGTAACGATGAGTTAGCAACATGCC    | 67.2°C                |
| UbC_Fwd           | G TTCAGAGTTCTACAGTCCGACGATC NNNNNNGTGAGGCGTCAGTTTCTTGGTGC      | 67.2°C                |
| SV40_Fwd          | G TTCAGAGTTCTACAGTCCGACGATC NNNNNNGTTAATTAAGTACTTACTGCAGGCAGAA | 67.2°C                |
| CMV_Fwd           | G TTCAGAGTTCTACAGTCCGACGATC NNNNNNGCACAAAATCAACGGGACTTTCC      | 67.2°C                |
| CAG_Fwd           | G TTCAGAGTTCTACAGTCCGACGATC NNNNNNGTTCGGCTTCTGGCGTGTGA         | 67.2°C                |
| CBh_Fwd           | G TTCAGAGTTCTACAGTCCGACGATC NNNNNNAAGAGGTAAGGGTTAAGGGATGGT     | 67.2°C                |
| Generic_Rev       | TTCCTTGGCACCCGAGAATTCCACGTGGAACCAAGTTCTTCAGGC                  | 67.2 or 71.1°C        |

**Supplementary Table 4. qPCR Oligonucleotide Pairs**

| Gene          | Sequence Forward Primer (5' - 3') | Sequence Reverse Primer (5' - 3') |
|---------------|-----------------------------------|-----------------------------------|
| <i>RPL37A</i> | GTGGTTCCTGCATGAAGACAGTG           | TTCTGATGGCGGACTTTACCG             |
| <i>OCT4</i>   | GTGGAGGAAGCTGACAACAA              | ATTCTCCAGTTGCCTCTCA               |
| <i>NANOG</i>  | AGCAGATGCAAGAACTCTCAA             | TGAGGCCTTCTGCGTCACAC              |
| <i>KLF4</i>   | ATAGCCTAAATGATGGTGCTTGG           | AACTTTGGCTTCCTTGTGG               |
| <i>SOX2</i>   | GCTACAGCATGATGCAGGACCA            | TCTGCGAGCTGGTCATGGAGTT            |
| <i>TUBB3</i>  | CAACCAGATCGGGGCCAAGTT             | CCGAGTCGCCACGTAGTT                |
| <i>MAP2</i>   | AGACTGCAGCTCTGCCTTAG              | AGGCTGTAAGTAAATCTTCCTCC           |
| <i>SYN1</i>   | CCCTGGGTGTTTGCCAGAT               | ACCACGGGTACGTTGTACT               |
| <i>BRN2</i>   | ACCCGCTTTATCGAAGGCAA              | CCTCCATAACCTCCCCAGA               |
| <i>GRIA4</i>  | GGCCAGGGAATTGACATGGA              | AACCAACCTTCTAGGTCCTGTG            |
| <i>VGLUT2</i> | GTAGACTGGCAACCACCTCC              | CCATTCAAAGCTCCGTAGAC              |
| <i>SYP</i>    | ACCTCGGGACTCAACCTCGG              | GAACCACAGGTTGCCGCCAG              |
| <i>Ngn2</i>   | TATGCACCTCACCTCCCCATAG            | GAAGGGAGGAGGGCTCGACT              |
| <i>ISL1</i>   | AAGGTGGAGCTGCATTGGTTTG            | TAAACCAGCTACAGGACAGGCC            |
| <i>ChAT</i>   | CTCAGCTACAAGGCCCTGCT              | ACCAGCGTGCCTGGGTATG               |
| <i>FOXA2</i>  | GGAGCGGTGAAGATGGAA                | TACGTGTTTCATGCCGTTTCAT            |
| <i>PDX1</i>   | GATGAAGTCTACAAAGCTCACG            | GTTCAACATGACAGCCAGCTC             |
| <i>SOX17</i>  | CGCACGGAATTTGAACAGTA              | GGATCAGGGACCTGTCACAC              |
| <i>ACTA2</i>  | GTGATCACCATCGGAAATGAA             | TCATGATGCTGTTGTAGGTGGT            |
| <i>VIM</i>    | AGTCCACTGAGTACCGGAGAC             | CATTTACGCATCTGGCGTTC              |
| <i>T</i>      | TGTTTATCCATGCTGCAATCC             | CCGTTGCTCACAGACCACAG              |
| <i>PAX6</i>   | CGAGATTTAGAGCCCCATA               | AAGACACCACCGAGCTGATT              |
| <i>LHX3</i>   | ACAGACACTGGCACAGCAAG              | AGCAGTGCAGATGGTACACG              |
| <i>HB9</i>    | GCCTAAGATGCCGACTTCAAC             | CGCGACAGGTAAGTTGAGCT              |
| <i>VACHT</i>  | GCTGTTTGCTTCCAAGGCTATCC           | GAAGGCGAACAGGACTGTAGAG            |
| <i>LHX4</i>   | TGGCGGACAGGTGCTTCTCCA             | AGGTGGTAGACAAAGTCCTGGG            |
| <i>CDH5</i>   | CCTACCAGCCCAAAGTGTGT              | TGTCCTTGCTATTGCGGAGA              |
| <i>CD31</i>   | ATGCCGTGGAAAGCAGATAC              | CTGTTCTTCTCGGAACATGGA             |
| <i>TIE2</i>   | ACGACCATGACGGCGAATG               | CGGCAGCCTGATATGCCTG               |
| <i>FLK1</i>   | CGGACAGTGGTATGGTTCTTG             | GCCACAGACTCCCTGCTTT               |
| <i>TAL1</i>   | CCAACAATCGAGTGAAGAGGA             | CCGGCTGTTGGTGAAGATAC              |
